# Supplementary material for: Effects of the maternal and current social environment on female body mass and reproductive traits in Japanese quail (Coturnix japonica)
Source: Oxford University Press journal article supplement (doi:10.1242/jeb.187005), 2019-01-01
Supplement: jeb187005supp.pdf [file jeb187005supp.pdf]

## Table S1

[Click here to Download Table S1](#)

**Table S2. General linear mixed model of effects of the maternal and F1 own social environment on female body mass.**

| <b>Fixed effects</b>                                                                 |                             |                             |                |               |              |          |                   |
|--------------------------------------------------------------------------------------|-----------------------------|-----------------------------|----------------|---------------|--------------|----------|-------------------|
|                                                                                      | Estimate                    | SE                          | df             | t             | $\chi^2$     | df       | p                 |
| <b>(Intercept)</b>                                                                   | <b>205.200</b>              | <b>4.620</b>                | <b>35.870</b>  | <b>44.403</b> |              |          |                   |
| Day * maternal social environment * own social environment <sup>a</sup>              | 0.002                       | 0.254                       | 286.900        | 0.006         |              |          |                   |
| Day <sup>2</sup> * maternal social environment * own social environment <sup>a</sup> | 0.022                       | 0.013                       | 286.900        | 1.667         | 4.51         | 3        | 0.21              |
| Day <sup>3</sup> * maternal social environment * own social environment <sup>a</sup> | -4.62*10 <sup>-4</sup>      | 3.13*10 <sup>-4</sup>       | 287.100        | -1.474        |              |          |                   |
| Day * maternal social environment <sup>a</sup>                                       | 0.030                       | 0.126                       | 286.900        | 0.236         |              |          |                   |
| Day <sup>2</sup> * maternal social environment <sup>a</sup>                          | 0.003                       | 0.007                       | 286.900        | 0.459         | 0.46         | 3        | 0.93              |
| Day <sup>3</sup> * maternal social environment <sup>a</sup>                          | -5.64*10 <sup>-5</sup>      | -1.54*10 <sup>-4</sup>      | 286.900        | -0.366        |              |          |                   |
| <b>Day * own social environment</b>                                                  | <b>0.168</b>                | <b>0.128</b>                | <b>287.000</b> | <b>1.313</b>  |              |          |                   |
| <b>Day<sup>2</sup> * own social environment</b>                                      | <b>-0.002</b>               | <b>0.007</b>                | <b>286.900</b> | <b>-0.225</b> | <b>21.94</b> | <b>3</b> | <b>&lt; 0.001</b> |
| <b>Day<sup>3</sup> * own social environment</b>                                      | <b>7.25*10<sup>-5</sup></b> | <b>1.57*10<sup>-4</sup></b> | <b>287.100</b> | <b>0.460</b>  |              |          |                   |
| <b>Maternal social environment * own social environment</b>                          | <b>-13.260</b>              | <b>6.391</b>                | <b>34.090</b>  | <b>-2.076</b> | <b>4.14</b>  | <b>1</b> | <b>0.04</b>       |
| Day                                                                                  | 2.215                       | 0.082                       | 286.900        | 26.884        |              |          | < 0.001           |
| Day <sup>2</sup>                                                                     | -0.086                      | 0.004                       | 286.700        | -19.739       |              |          | < 0.001           |
| Day <sup>3</sup>                                                                     | -8.97*10 <sup>-4</sup>      | 9.93*10 <sup>-5</sup>       | 286.800        | 9.038         |              |          | < 0.001           |
| <b>Maternal social environment</b>                                                   | <b>3.648</b>                | <b>6.506</b>                | <b>34.100</b>  | <b>0.561</b>  |              |          | <b>0.58</b>       |
| <b>Own social environment</b>                                                        | <b>14.370</b>               | <b>4.723</b>                | <b>42.220</b>  | <b>3.043</b>  |              |          | <b>0.004</b>      |
| <b>Random effects</b>                                                                |                             |                             |                |               |              |          |                   |
|                                                                                      | Variance                    | Std.Dev.                    |                |               |              |          |                   |
| <b>Maternal ID : F1 ID<sup>b</sup></b>                                               | <b>85.45</b>                | <b>9.244</b>                |                |               |              |          |                   |
| <b>Maternal ID</b>                                                                   | <b>159.47</b>               | <b>12.628</b>               |                |               |              |          |                   |
| <b>Residual</b>                                                                      | <b>120.24</b>               | <b>10.966</b>               |                |               |              |          |                   |
| <b>Post-hoc tests; split by maternal social environment:</b>                         |                             |                             |                |               |              |          |                   |
| <b>Offspring of pair-housed mothers</b>                                              |                             |                             |                |               |              |          |                   |
| <b>Fixed effects</b>                                                                 |                             |                             |                |               |              |          |                   |
|                                                                                      | Estimate                    | SE                          | df             | t             | $\chi^2$     | df       | p                 |
| <b>(Intercept)</b>                                                                   | <b>205.800</b>              | <b>5.636</b>                | <b>15.520</b>  | <b>36.513</b> |              |          |                   |
| Day * own social environment                                                         | 0.165                       | 0.169                       | 146.600        | 0.975         |              |          |                   |
| Day <sup>2</sup> * own social environment                                            | -0.013                      | 0.009                       | 146.400        | -1.466        | 20.77        | 3        | < 0.001           |
| Day <sup>3</sup> * own social environment                                            | 3.08*10 <sup>-4</sup>       | 2.08*10 <sup>-4</sup>       | 146.700        | 1.482         |              |          |                   |

|                                                        |                       |                       |               |               |                |          |             |                  |
|--------------------------------------------------------|-----------------------|-----------------------|---------------|---------------|----------------|----------|-------------|------------------|
| Day                                                    | 2.194                 | 0.103                 | 146.600       | 21.265        |                |          |             | <0.001           |
| Day <sup>2</sup>                                       | -0.083                | 0.005                 | 146.300       | -15.353       |                |          |             | <0.001           |
| Day <sup>3</sup>                                       | 8.42*10 <sup>-4</sup> | 1.24*10 <sup>-4</sup> | 146.400       | 6.814         |                |          |             | <0.001           |
| <b>Own social environment</b>                          | <b>15.530</b>         | <b>3.685</b>          | <b>31.050</b> | <b>4.214</b>  |                |          |             | <b>&lt;0.001</b> |
| <b>Random effects</b>                                  |                       |                       |               |               |                |          |             |                  |
|                                                        | Variance              | Std.Dev.              |               |               |                |          |             |                  |
| <b>Maternal ID : F1 ID<sup>b</sup></b>                 | <b>28.370</b>         | <b>5.327</b>          |               |               |                |          |             |                  |
| <b>Maternal ID</b>                                     | <b>342.450</b>        | <b>18.506</b>         |               |               |                |          |             |                  |
| <b>Residual</b>                                        | <b>102.540</b>        | <b>10.126</b>         |               |               |                |          |             |                  |
| <b>Offspring of group-housed mothers</b>               |                       |                       |               |               |                |          |             |                  |
| <b>Fixed effects</b>                                   |                       |                       |               |               |                |          |             |                  |
|                                                        | Estimate              | SE                    | df            | t             | χ <sup>2</sup> | df       | p           |                  |
| (Intercept)                                            | 208.800               | 4.209                 | 32.390        | 49.601        |                |          |             |                  |
| Day * own social environment                           | 0.164                 | 0.191                 | 140.400       | 0.858         |                |          |             |                  |
| Day <sup>2</sup> * own social environment              | 0.009                 | 0.010                 | 140.400       | 0.925         | 6.55           | 3        | 0.09        |                  |
| Day <sup>3</sup> * own social environment              | 1.48*10 <sup>-4</sup> | 2.35*10 <sup>-4</sup> | 140.400       | -0.632        |                |          |             |                  |
| Day                                                    | 2.241                 | 0.129                 | 140.300       | 17.373        |                |          |             | <0.001           |
| Day <sup>2</sup>                                       | -0.090                | 0.007                 | 140.300       | -13.013       |                |          |             | <0.001           |
| Day <sup>3</sup>                                       | 9.66*10 <sup>-4</sup> | 1.57*10 <sup>-4</sup> | 140.300       | 6.172         |                |          |             | <0.001           |
| <b>Own social environment</b>                          | <b>-1.544</b>         | <b>5.494</b>          | <b>34.330</b> | <b>-0.281</b> |                |          |             | <b>0.78</b>      |
| <b>Random effects</b>                                  |                       |                       |               |               |                |          |             |                  |
|                                                        | Variance              | Std.Dev.              |               |               |                |          |             |                  |
| <b>Maternal ID : F1 ID<sup>b</sup></b>                 | <b>122.610</b>        | <b>11.073</b>         |               |               |                |          |             |                  |
| <b>Maternal ID</b>                                     | <b>37.150</b>         | <b>6.095</b>          |               |               |                |          |             |                  |
| <b>Residual</b>                                        | <b>134.390</b>        | <b>11.593</b>         |               |               |                |          |             |                  |
| <b>Post-hoc tests; split by own social environment</b> |                       |                       |               |               |                |          |             |                  |
| <b>Pair-housed F1 females</b>                          |                       |                       |               |               |                |          |             |                  |
| <b>Fixed effects</b>                                   |                       |                       |               |               |                |          |             |                  |
|                                                        | Estimate              | SE                    | df            | t             | χ <sup>2</sup> | df       | p           |                  |
| (Intercept)                                            | 202.400               | 4.154                 | 19.270        | 48.727        |                |          |             |                  |
| Day                                                    | 2.215                 | 0.077                 | 168.700       | 28.641        |                |          |             |                  |
| Day <sup>2</sup>                                       | -0.086                | 0.004                 | 168.700       | -21.038       | 476.62         | 3        | < 0.001     |                  |
| Day <sup>3</sup>                                       | 8.98*10 <sup>-4</sup> | 9.31*10 <sup>-5</sup> | 168.700       | 9.640         |                |          |             |                  |
| <b>Maternal social environment</b>                     | <b>5.322</b>          | <b>5.883</b>          | <b>17.940</b> | <b>0.905</b>  | <b>0.81</b>    | <b>1</b> | <b>0.37</b> |                  |
| <b>Random effects</b>                                  |                       |                       |               |               |                |          |             |                  |
|                                                        | Variance              | Std.Dev.              |               |               |                |          |             |                  |
| <b>Maternal ID : F1 ID<sup>b</sup></b>                 | <b>85.190</b>         | <b>9.230</b>          |               |               |                |          |             |                  |
| <b>Maternal ID</b>                                     | <b>101.430</b>        | <b>10.070</b>         |               |               |                |          |             |                  |
| <b>Residual</b>                                        | <b>105.850</b>        | <b>10.290</b>         |               |               |                |          |             |                  |
| <b>Group-housed F1 females</b>                         |                       |                       |               |               |                |          |             |                  |
| <b>Fixed effects</b>                                   |                       |                       |               |               |                |          |             |                  |
|                                                        | Estimate              | SE                    | df            | t             | χ <sup>2</sup> | df       | p           |                  |
| (Intercept)                                            | 218.000               | 6.102                 | 19.490        | 35.731        |                |          |             |                  |

|                                                                   |                       |                       |         |         |                |    |         |  |
|-------------------------------------------------------------------|-----------------------|-----------------------|---------|---------|----------------|----|---------|--|
| Day                                                               | 2.383                 | 0.106                 | 117.600 | 22.496  |                |    |         |  |
| Day <sup>2</sup>                                                  | -0.088                | 0.006                 | 117.600 | -15.855 | 331.68         | 3  | < 0.001 |  |
| Day <sup>3</sup>                                                  | 9.68*10 <sup>-4</sup> | 1.32*10 <sup>-4</sup> | 117.700 | 7.315   |                |    |         |  |
| Maternal social environment                                       | -11.430               | 8.379                 | 17.280  | -1.364  | 1.77           | 1  | 0.18    |  |
| <b>Random effects</b>                                             |                       |                       |         |         |                |    |         |  |
|                                                                   | Variance              | Std.Dev.              |         |         |                |    |         |  |
| Maternal ID : F1 ID <sup>b</sup>                                  | 63.110                | 7.944                 |         |         |                |    |         |  |
| Maternal ID                                                       | 244.420               | 15.634                |         |         |                |    |         |  |
| Residual                                                          | 141.150               | 11.881                |         |         |                |    |         |  |
| <b>Post-hoc tests; split by day</b>                               |                       |                       |         |         |                |    |         |  |
| <b>Day 24</b>                                                     |                       |                       |         |         |                |    |         |  |
| <b>Fixed effects</b>                                              |                       |                       |         |         |                |    |         |  |
|                                                                   | Estimate              | SE                    | df      | t       | χ <sup>2</sup> | df | p       |  |
| (Intercept)                                                       | 116.295               | 3.561                 | 28.387  | 32.662  |                |    |         |  |
| Maternal social environment                                       | -2.113                | 4.779                 | 23.580  | -0.442  | 0.2            | 1  | 0.66    |  |
| Own social environment                                            | 3.441                 | 2.893                 | 34.772  | 1.189   | 1.39           | 1  | 0.24    |  |
| Maternal social environment * own social environment <sup>a</sup> | -2.135                | 5.811                 | 34.585  | -0.367  | 0.13           | 1  | 0.72    |  |
| <b>Random effects</b>                                             |                       |                       |         |         |                |    |         |  |
|                                                                   | Variance              | Std.Dev.              |         |         |                |    |         |  |
| Maternal ID                                                       | 95.840                | 9.790                 |         |         |                |    |         |  |
| Residual                                                          | 88.530                | 9.409                 |         |         |                |    |         |  |
| <b>Day 30</b>                                                     |                       |                       |         |         |                |    |         |  |
| <b>Fixed effects</b>                                              |                       |                       |         |         |                |    |         |  |
|                                                                   | Estimate              | SE                    | df      | t       | χ <sup>2</sup> | df | p       |  |
| (Intercept)                                                       | 149.121               | 4.292                 | 27.343  | 34.741  |                |    |         |  |
| Maternal social environment                                       | -5.379                | 5.861                 | 23.980  | -0.918  | 0.83           | 1  | 0.36    |  |
| Own social environment                                            | 4.349                 | 2.894                 | 31.810  | 1.503   | 2.19           | 1  | 0.14    |  |
| Maternal social environment * own social environment <sup>a</sup> | -8.599                | 5.729                 | 31.905  | -1.501  | 2.19           | 1  | 0.14    |  |
| <b>Random effects</b>                                             |                       |                       |         |         |                |    |         |  |
|                                                                   | Variance              | Std.Dev.              |         |         |                |    |         |  |
| Maternal ID                                                       | 171.760               | 13.106                |         |         |                |    |         |  |
| Residual                                                          | 83.810                | 9.155                 |         |         |                |    |         |  |
| <b>Day 37</b>                                                     |                       |                       |         |         |                |    |         |  |
| <b>Fixed effects</b>                                              |                       |                       |         |         |                |    |         |  |
|                                                                   | Estimate              | SE                    | df      | t       | χ <sup>2</sup> | df | p       |  |
| (Intercept)                                                       | 180.357               | 4.879                 | 33.334  | 36.968  |                |    |         |  |
| Maternal social environment                                       | 3.955                 | 7.085                 | 35.612  | 0.558   |                |    | 0.58    |  |
| Own social environment                                            | 13.919                | 5.018                 | 33.335  | 2.774   |                |    | 0.009   |  |
| Maternal social environment * own social environment              | -16.558               | 7.219                 | 34.714  | -2.294  | 5.00           | 1  | 0.03    |  |
| <b>Random effects</b>                                             |                       |                       |         |         |                |    |         |  |

|                                                                         | Variance       | Std.Dev.      |               |               |             |          |              |
|-------------------------------------------------------------------------|----------------|---------------|---------------|---------------|-------------|----------|--------------|
| <b>Maternal ID</b>                                                      | <b>177.000</b> | <b>13.300</b> |               |               |             |          |              |
| <b>Residual</b>                                                         | <b>135.300</b> | <b>11.630</b> |               |               |             |          |              |
| <b>Day 44</b>                                                           |                |               |               |               |             |          |              |
| <b>Fixed effects</b>                                                    |                |               |               |               |             |          |              |
|                                                                         | Estimate       | SE            | df            | t             | $\chi^2$    | df       | p            |
| <b>(Intercept)</b>                                                      | <b>208.473</b> | <b>5.542</b>  | <b>32.531</b> | <b>37.617</b> |             |          |              |
| <b>Maternal social environment</b>                                      | <b>6.778</b>   | <b>8.053</b>  | <b>34.895</b> | <b>0.842</b>  |             |          | <b>0.41</b>  |
| <b>Own social environment</b>                                           | <b>19.030</b>  | <b>5.775</b>  | <b>32.545</b> | <b>3.295</b>  |             |          | <b>0.002</b> |
| <b>Maternal social environment * own social environment</b>             | <b>-16.671</b> | <b>8.306</b>  | <b>33.983</b> | <b>-2.007</b> | <b>3.88</b> | <b>1</b> | <b>0.049</b> |
| <b>Random effects</b>                                                   |                |               |               |               |             |          |              |
|                                                                         | Variance       | Std.Dev.      |               |               |             |          |              |
| <b>Maternal ID</b>                                                      | <b>223.700</b> | <b>14.960</b> |               |               |             |          |              |
| <b>Residual</b>                                                         | <b>179.900</b> | <b>13.410</b> |               |               |             |          |              |
| <b>Day 61</b>                                                           |                |               |               |               |             |          |              |
| <b>Fixed effects</b>                                                    |                |               |               |               |             |          |              |
|                                                                         | Estimate       | SE            | df            | t             | $\chi^2$    | df       | p            |
| <b>(Intercept)</b>                                                      | <b>220.301</b> | <b>5.640</b>  | <b>28.335</b> | <b>39.064</b> |             |          |              |
| <b>Maternal social environment</b>                                      | <b>-2.699</b>  | <b>7.355</b>  | <b>21.428</b> | <b>-0.367</b> | <b>0.13</b> | <b>1</b> | <b>0.71</b>  |
| <b>Own social environment</b>                                           | <b>10.442</b>  | <b>5.143</b>  | <b>36.334</b> | <b>2.030</b>  | <b>3.97</b> | <b>1</b> | <b>0.046</b> |
| <b>Maternal social environment * own social environment<sup>a</sup></b> | <b>-18.76</b>  | <b>9.835</b>  | <b>36.251</b> | <b>-1.907</b> | <b>3.49</b> | <b>1</b> | <b>0.06</b>  |
| <b>Random effects</b>                                                   |                |               |               |               |             |          |              |
|                                                                         | Variance       | Std.Dev.      |               |               |             |          |              |
| <b>Maternal ID</b>                                                      | <b>187.900</b> | <b>13.710</b> |               |               |             |          |              |
| <b>Residual</b>                                                         | <b>280.700</b> | <b>16.750</b> |               |               |             |          |              |
| <b>Day 90</b>                                                           |                |               |               |               |             |          |              |
| <b>Fixed effects</b>                                                    |                |               |               |               |             |          |              |
|                                                                         | Estimate       | SE            | df            | t             | $\chi^2$    | df       | p            |
| <b>(Intercept)</b>                                                      | <b>214.755</b> | <b>4.930</b>  | <b>24.713</b> | <b>43.559</b> |             |          |              |
| <b>Maternal social environment</b>                                      | <b>3.520</b>   | <b>6.680</b>  | <b>19.953</b> | <b>0.527</b>  | <b>0.28</b> | <b>1</b> | <b>0.60</b>  |
| <b>Own social environment</b>                                           | <b>16.726</b>  | <b>6.318</b>  | <b>32.297</b> | <b>2.648</b>  | <b>6.44</b> | <b>1</b> | <b>0.011</b> |
| <b>Maternal social environment * own social environment<sup>a</sup></b> | <b>-7.336</b>  | <b>12.550</b> | <b>32.250</b> | <b>-0.585</b> | <b>0.34</b> | <b>1</b> | <b>0.56</b>  |
| <b>Random effects</b>                                                   |                |               |               |               |             |          |              |
|                                                                         | Variance       | Std.Dev.      |               |               |             |          |              |
| <b>Maternal ID</b>                                                      | <b>56.580</b>  | <b>7.522</b>  |               |               |             |          |              |
| <b>Residual</b>                                                         | <b>321.820</b> | <b>17.939</b> |               |               |             |          |              |
| <b>Day 97</b>                                                           |                |               |               |               |             |          |              |
| <b>Fixed effects</b>                                                    |                |               |               |               |             |          |              |
|                                                                         | Estimate       | SE            | df            | t             | $\chi^2$    | df       | p            |
| <b>(Intercept)</b>                                                      | <b>210.825</b> | <b>4.915</b>  | <b>21.503</b> | <b>42.898</b> |             |          |              |
| <b>Maternal social</b>                                                  | <b>1.260</b>   | <b>6.873</b>  | <b>18.242</b> | <b>0.183</b>  | <b>0.03</b> | <b>1</b> | <b>0.86</b>  |

| <b>environment</b>                                                                   |                        |                       |               |               |              |          |              |
|--------------------------------------------------------------------------------------|------------------------|-----------------------|---------------|---------------|--------------|----------|--------------|
| <b>Own social environment</b>                                                        | <b>14.973</b>          | <b>6.970</b>          | <b>29.798</b> | <b>2.148</b>  | <b>4.31</b>  | <b>1</b> | <b>0.04</b>  |
| Maternal social environment * own social environment <sup>a</sup>                    | -12.447                | 13.816                | 29.726        | -0.901        | 0.8          | 1        | 0.37         |
| <b>Random effects</b>                                                                |                        |                       |               |               |              |          |              |
|                                                                                      | Variance               | Std.Dev.              |               |               |              |          |              |
| <b>Maternal ID</b>                                                                   | <b>63.770</b>          | <b>7.985</b>          |               |               |              |          |              |
| <b>Residual</b>                                                                      | <b>290.630</b>         | <b>17.048</b>         |               |               |              |          |              |
| <b>Including only data until day 61 (when most cages were still together):</b>       |                        |                       |               |               |              |          |              |
| <b>Fixed effects</b>                                                                 |                        |                       |               |               |              |          |              |
|                                                                                      | Estimate               | SE                    | df            | t             | $\chi^2$     | df       | p            |
| <b>(Intercept)</b>                                                                   | <b>215.200</b>         | <b>4.612</b>          | <b>35.970</b> | <b>46.656</b> |              |          |              |
| Day * maternal social environment * own social environment <sup>a</sup>              | 0.137                  | 0.635                 | 211.100       | 0.215         |              |          |              |
| Day <sup>2</sup> * maternal social environment * own social environment <sup>a</sup> | 0.015                  | 0.025                 | 211.100       | 0.628         | 5.42         | 3        | 0.14         |
| Day <sup>3</sup> * maternal social environment * own social environment <sup>a</sup> | -0.001                 | 0.002                 | 211.100       | 0.633         |              |          |              |
| Day * maternal social environment <sup>a</sup>                                       | 0.235                  | 0.320                 | 211.100       | 0.735         |              |          |              |
| Day <sup>2</sup> * maternal social environment <sup>a</sup>                          | -0.010                 | 0.012                 | 211.100       | -0.833        | 0.90         | 3        | 0.83         |
| Day <sup>3</sup> * maternal social environment <sup>a</sup>                          | -9.47*10 <sup>-4</sup> | 0.001                 | 211.100       | -0.871        |              |          |              |
| Day * own social environment                                                         | 0.349                  | 0.321                 | 211.100       | 1.086         |              |          |              |
| Day <sup>2</sup> * own social environment                                            | -0.008                 | -0.012                | 211.100       | -0.603        | 6.05         | 3        | 0.11         |
| Day <sup>3</sup> * own social environment                                            | -5.50*10 <sup>-4</sup> | 0.001                 | 211.100       | -0.505        |              |          |              |
| <b>Maternal social environment * own social environment</b>                          | <b>-11.920</b>         | <b>6.019</b>          | <b>33.010</b> | <b>-1.980</b> | <b>3.78</b>  | <b>1</b> | <b>0.052</b> |
| Day                                                                                  | 3.374                  | 0.162                 | 211.100       | 20.812        | <0.001       |          |              |
| Day <sup>2</sup>                                                                     | -0.139                 | 0.006                 | 211.100       | -22.127       | <0.001       |          |              |
| Day <sup>3</sup>                                                                     | -0.003                 | 5.50*10 <sup>-4</sup> | 211.100       | -6.064        | <0.001       |          |              |
| <b>Maternal social environment</b>                                                   | <b>2.455</b>           | <b>6.464</b>          | <b>33.780</b> | <b>0.380</b>  | <b>0.71</b>  |          |              |
| <b>Own social environment</b>                                                        | <b>12.700</b>          | <b>4.177</b>          | <b>31.960</b> | <b>3.041</b>  | <b>0.005</b> |          |              |
| <b>Random effects</b>                                                                |                        |                       |               |               |              |          |              |
|                                                                                      | Variance               | Std.Dev.              |               |               |              |          |              |
| <b>Maternal ID : F1 ID<sup>b</sup></b>                                               | <b>75.400</b>          | <b>8.683</b>          |               |               |              |          |              |
| <b>Maternal ID</b>                                                                   | <b>168.620</b>         | <b>12.985</b>         |               |               |              |          |              |
| <b>Residual</b>                                                                      | <b>78.430</b>          | <b>8.856</b>          |               |               |              |          |              |
| <b>Post-hoc tests; split by maternal social environment:</b>                         |                        |                       |               |               |              |          |              |
| <b>Offspring of pair-housed mothers</b>                                              |                        |                       |               |               |              |          |              |
| <b>Fixed effects</b>                                                                 |                        |                       |               |               |              |          |              |

|                                                        | Estimate | SE                    | df      | t       | $\chi^2$ | df | p      |
|--------------------------------------------------------|----------|-----------------------|---------|---------|----------|----|--------|
| (Intercept)                                            | 215.100  | 5.642                 | 16.790  | 38.127  |          |    |        |
| Day                                                    | 3.245    | 0.233                 | 107.100 | 13.931  |          |    |        |
| Day <sup>2</sup>                                       | -0.134   | 0.009                 | 107.200 | -14.773 | 361.07   | 3  | <0.001 |
| Day <sup>3</sup>                                       | -0.003   | 7.90*10 <sup>-4</sup> | 107.100 | -3.602  |          |    |        |
| Own social environment                                 | 11.990   | 3.213                 | 15.000  | 3.733   | 10.31    | 1  | 0.001  |
| <b>Random effects</b>                                  |          |                       |         |         |          |    |        |
|                                                        | Variance | Std.Dev.              |         |         |          |    |        |
| Maternal ID : F1 ID <sup>b</sup>                       | 33.720   | 5.807                 |         |         |          |    |        |
| Maternal ID                                            | 326.380  | 18.066                |         |         |          |    |        |
| Residual                                               | 82.450   | 9.080                 |         |         |          |    |        |
| <b>Offspring of group-housed mothers</b>               |          |                       |         |         |          |    |        |
| <b>Fixed effects</b>                                   |          |                       |         |         |          |    |        |
|                                                        | Estimate | SE                    | df      | t       | $\chi^2$ | df | p      |
| (Intercept)                                            | 218.200  | 4.080                 | 30.540  | 53.488  |          |    |        |
| Day                                                    | 3.509    | 0.224                 | 104.000 | 15.653  |          |    |        |
| Day <sup>2</sup>                                       | -0.145   | 0.009                 | 104.000 | -16.674 | 356.94   | 3  | <0.001 |
| Day <sup>3</sup>                                       | -0.004   | 7.61*10 <sup>-4</sup> | 104.000 | -5.501  |          |    |        |
| Own social environment                                 | -0.166   | 4.606                 | 21.720  | -0.036  | 0.001    | 1  | 0.97   |
| <b>Random effects</b>                                  |          |                       |         |         |          |    |        |
|                                                        | Variance | Std.Dev.              |         |         |          |    |        |
| Maternal ID : F1 ID <sup>b</sup>                       | 105.100  | 10.252                |         |         |          |    |        |
| Maternal ID                                            | 49.710   | 7.050                 |         |         |          |    |        |
| Residual                                               | 73.600   | 8.579                 |         |         |          |    |        |
| <b>Post-hoc tests; split by own social environment</b> |          |                       |         |         |          |    |        |
| <b>Pair-housed F1 females</b>                          |          |                       |         |         |          |    |        |
| <b>Fixed effects</b>                                   |          |                       |         |         |          |    |        |
|                                                        | Estimate | SE                    | df      | t       | $\chi^2$ | df | p      |
| (Intercept)                                            | 211.100  | 4.114                 | 20.640  | 51.296  |          |    |        |
| Day                                                    | 3.215    | 0.197                 | 115.000 | 16.290  |          |    |        |
| Day <sup>2</sup>                                       | -0.136   | 0.008                 | 115.000 | -17.732 | 398.72   | 3  | <0.001 |
| Day <sup>3</sup>                                       | -0.003   | 0.001                 | 115.000 | -4.617  |          |    |        |
| Maternal social environment                            | 4.514    | 5.687                 | 17.750  | 0.794   | 0.62     | 1  | 0.43   |
| <b>Random effects</b>                                  |          |                       |         |         |          |    |        |
|                                                        | Variance | Std.Dev.              |         |         |          |    |        |
| Maternal ID : F1 ID <sup>b</sup>                       | 116.67   | 10.801                |         |         |          |    |        |
| Maternal ID                                            | 68.99    | 8.306                 |         |         |          |    |        |
| Residual                                               | 63.58    | 7.973                 |         |         |          |    |        |
| <b>Group-housed F1 females</b>                         |          |                       |         |         |          |    |        |
| <b>Fixed effects</b>                                   |          |                       |         |         |          |    |        |
|                                                        | Estimate | SE                    | df      | t       | $\chi^2$ | df | p      |
| (Intercept)                                            | 227.100  | 6.075                 | 21.570  | 37.387  |          |    |        |
| Day                                                    | 3.564    | 0.260                 | 96.000  | 13.707  |          |    |        |
| Day <sup>2</sup>                                       | -0.143   | 0.010                 | 96.000  | -14.231 | 312.08   | 3  | <0.001 |
| Day <sup>3</sup>                                       | -0.004   | 0.001                 | 96.000  | -4.124  |          |    |        |

|                                        |                |               |               |               |             |          |             |
|----------------------------------------|----------------|---------------|---------------|---------------|-------------|----------|-------------|
| <b>Maternal social environment</b>     | <b>-11.110</b> | <b>8.127</b>  | <b>17.220</b> | <b>-1.367</b> | <b>1.77</b> | <b>1</b> | <b>0.18</b> |
| <b>Random effects</b>                  |                |               |               |               |             |          |             |
|                                        | Variance       | Std.Dev.      |               |               |             |          |             |
| <b>Maternal ID : F1 ID<sup>b</sup></b> | <b>67.49</b>   | <b>8.215</b>  |               |               |             |          |             |
| <b>Maternal ID</b>                     | <b>227.08</b>  | <b>15.069</b> |               |               |             |          |             |
| <b>Residual</b>                        | <b>91.41</b>   | <b>9.561</b>  |               |               |             |          |             |

Estimates are given on the original scale. Maternal and F1 pair-housing is coded as 0, group-housing is coded as 1. Factors included in the final model are presented in bold.

<sup>a</sup> estimates and statistics are from the last model that still included the interaction.

<sup>b</sup> F1 ID nested within maternal ID.

**Table S3. General linear mixed model of effects of the maternal and F1 own social environment on egg mass and offspring mass at hatching.**

|                                                                   |               |              |             |          |             |  |  |
|-------------------------------------------------------------------|---------------|--------------|-------------|----------|-------------|--|--|
| <b>Effects on egg mass:</b>                                       |               |              |             |          |             |  |  |
| <b>Fixed effects</b>                                              |               |              |             |          |             |  |  |
|                                                                   | Estimate      | SE           | $\chi^2$    | df       | p           |  |  |
| <b>(Intercept)</b>                                                | <b>10.412</b> | <b>0.193</b> |             |          |             |  |  |
| Maternal social environment * own social environment <sup>a</sup> | -0.115        | 0.556        | 0.04        | 1        | 0.84        |  |  |
| <b>Maternal social environment</b>                                | <b>-0.153</b> | <b>0.257</b> | <b>0.35</b> | <b>1</b> | <b>0.55</b> |  |  |
| <b>Own social environment</b>                                     | <b>0.711</b>  | <b>0.278</b> | <b>6.02</b> | <b>1</b> | <b>0.01</b> |  |  |
| <b>Random effects</b>                                             |               |              |             |          |             |  |  |
|                                                                   | Variance      | Std.Dev.     |             |          |             |  |  |
| <b>Maternal ID : F1 ID<sup>b</sup></b>                            | <b>0.595</b>  | <b>0.772</b> |             |          |             |  |  |
| <b>Maternal ID</b>                                                | <b>0.000</b>  | <b>0.000</b> |             |          |             |  |  |
| <b>Residual</b>                                                   | <b>0.258</b>  | <b>0.508</b> |             |          |             |  |  |
| <b>Including F1 female mass at day 90 as a covariate:</b>         |               |              |             |          |             |  |  |
| <b>Fixed effects</b>                                              |               |              |             |          |             |  |  |
|                                                                   | Estimate      | SE           | $\chi^2$    | df       | p           |  |  |
| <b>(Intercept)</b>                                                | <b>6.902</b>  | <b>1.341</b> |             |          |             |  |  |
| Maternal social environment * own social environment <sup>a</sup> | 0.003         | 0.502        | 0.00        | 1        | 0.995       |  |  |
| <b>Maternal social environment</b>                                | <b>-0.158</b> | <b>0.264</b> | <b>0.33</b> | <b>1</b> | <b>0.56</b> |  |  |
| <b>Own social environment</b>                                     | <b>0.439</b>  | <b>0.275</b> | <b>2.45</b> | <b>1</b> | <b>0.12</b> |  |  |
| <b>F1 female mass at day 90</b>                                   | <b>0.016</b>  | <b>0.006</b> | <b>5.59</b> | <b>1</b> | <b>0.02</b> |  |  |
| <b>Random effects</b>                                             |               |              |             |          |             |  |  |
|                                                                   | Variance      | Std.Dev.     |             |          |             |  |  |
| <b>Maternal ID : F1 ID<sup>b</sup></b>                            | <b>0.430</b>  | <b>0.655</b> |             |          |             |  |  |
| <b>Maternal ID</b>                                                | <b>0.091</b>  | <b>0.302</b> |             |          |             |  |  |
| <b>Residual</b>                                                   | <b>0.258</b>  | <b>0.508</b> |             |          |             |  |  |
| <b>Effects on offspring mass at hatching:</b>                     |               |              |             |          |             |  |  |
| <b>Fixed effects</b>                                              |               |              |             |          |             |  |  |
|                                                                   | Estimate      | SE           | $\chi^2$    | df       | p           |  |  |
| <b>(Intercept)</b>                                                | <b>6.926</b>  | <b>0.145</b> |             |          |             |  |  |
| Maternal social environment * own social                          | -0.261        | 0.543        | 0.23        | 1        | 0.63        |  |  |

| environment* F2 sex                                               |                              |                             |               |          |                   |
|-------------------------------------------------------------------|------------------------------|-----------------------------|---------------|----------|-------------------|
| Maternal social environment * F2 sex                              | -0.138                       | 0.262                       | 0.27          | 1        | 0.60              |
| Own social environment* F2 sex                                    | -0.115                       | 0.269                       | 0.18          | 1        | 0.67              |
| Maternal social environment * own social environment <sup>a</sup> | -0.457                       | 0.413                       | 1.19          | 1        | 0.28              |
| <b>Maternal social environment</b>                                | <b>-0.032</b>                | <b>0.199</b>                | <b>0.03</b>   | <b>1</b> | <b>0.87</b>       |
| <b>Own social environment</b>                                     | <b>0.830</b>                 | <b>0.211</b>                | <b>12.53</b>  | <b>1</b> | <b>&lt; 0.001</b> |
| F2 sex                                                            | -0.116                       | 0.131                       | 0.78          | 1        | 0.38              |
| Random effects                                                    |                              |                             |               |          |                   |
|                                                                   | Variance                     | Std.Dev.                    |               |          |                   |
| <b>Maternal ID : F1 ID<sup>b</sup></b>                            | <b>0.179</b>                 | <b>0.423</b>                |               |          |                   |
| <b>Maternal ID</b>                                                | <b>2.40*10<sup>-16</sup></b> | <b>1.55*10<sup>-8</sup></b> |               |          |                   |
| <b>Residual</b>                                                   | <b>0.228</b>                 | <b>0.477</b>                |               |          |                   |
| Including egg mass as a covariate:                                |                              |                             |               |          |                   |
| Fixed effects                                                     |                              |                             |               |          |                   |
|                                                                   | Estimate                     | SE                          | $\chi^2$      | df       | p                 |
| <b>(Intercept)</b>                                                | <b>-0.675</b>                | <b>0.353</b>                |               |          |                   |
| Maternal social environment * own social environment <sup>a</sup> | 0.137                        | 0.117                       | 1.36          | 1        | 0.24              |
| <b>Maternal social environment</b>                                | <b>-0.036</b>                | <b>0.078</b>                | <b>0.21</b>   | <b>1</b> | <b>0.65</b>       |
| <b>Own social environment</b>                                     | <b>0.077</b>                 | <b>0.065</b>                | <b>1.39</b>   | <b>1</b> | <b>0.24</b>       |
| <b>Egg mass</b>                                                   | <b>0.730</b>                 | <b>0.033</b>                | <b>135.61</b> | <b>1</b> | <b>&lt; 0.001</b> |
| Random effects                                                    |                              |                             |               |          |                   |
|                                                                   | Variance                     | Std.Dev.                    |               |          |                   |
| <b>Maternal ID : F1 ID<sup>b</sup></b>                            | <b>0.000<sup>c</sup></b>     | <b>0.000<sup>c</sup></b>    |               |          |                   |
| <b>Maternal ID</b>                                                | <b>0.013</b>                 | <b>0.112</b>                |               |          |                   |
| <b>Residual</b>                                                   | <b>0.042</b>                 | <b>0.205</b>                |               |          |                   |

Estimates are given on the original scale. Maternal and F1 pair-housing is coded as 0, group-housing is coded as 1. Factors included in the final model are presented in bold.

<sup>a</sup> estimates and statistics are from the last model that still included the interaction.

<sup>b</sup> F1 ID nested within maternal ID.

<sup>c</sup> variance parameters estimated as zero in the model.

**Table S4. General linear mixed model of effects of the maternal and F1 own social environment on female plasma hormone levels in the restraint stress protocol and the GnRH challenge.**

| <b>Female plasma corticosterone levels in the restraint stress protocol:</b>              |               |              |               |               |                   |    |      |
|-------------------------------------------------------------------------------------------|---------------|--------------|---------------|---------------|-------------------|----|------|
| <b>Fixed effects</b>                                                                      |               |              |               |               |                   |    |      |
|                                                                                           | Estimate      | SE           | $\chi^2$      | df            | p                 |    |      |
| <b>(Intercept)</b>                                                                        | <b>0.364</b>  | <b>0.055</b> |               |               |                   |    |      |
| Time of day <sup>a</sup>                                                                  | 0.420         | 0.762        | 0.30          | 1             | 0.58              |    |      |
| Maternal social environment * own social environment * sample <sup>a</sup>                | 0.288         | 0.186        | 2.32          | 1             | 0.13              |    |      |
| Maternal social environment * own social environment <sup>a</sup>                         | 0.008         | 0.118        | 0.005         | 1             | 0.95              |    |      |
| Own social environment * sample <sup>a</sup>                                              | 0.126         | 0.096        | 1.69          | 1             | 0.19              |    |      |
| Maternal social environment * sample <sup>a</sup>                                         | -0.121        | 0.092        | 1.69          | 1             | 0.19              |    |      |
| <b>Maternal social environment</b>                                                        | <b>-0.056</b> | <b>0.067</b> | <b>0.64</b>   | <b>1</b>      | <b>0.42</b>       |    |      |
| <b>Own social environment</b>                                                             | <b>0.012</b>  | <b>0.059</b> | <b>0.04</b>   | <b>1</b>      | <b>0.85</b>       |    |      |
| <b>Sample</b>                                                                             | <b>0.451</b>  | <b>0.047</b> | <b>53.24</b>  | <b>1</b>      | <b>&lt; 0.001</b> |    |      |
| <b>Random effects</b>                                                                     |               |              |               |               |                   |    |      |
|                                                                                           | Variance      | Std.Dev.     |               |               |                   |    |      |
| <b>Maternal ID : F1 ID<sup>b</sup></b>                                                    | <b>0.005</b>  | <b>0.072</b> |               |               |                   |    |      |
| <b>Maternal ID</b>                                                                        | <b>0.008</b>  | <b>0.091</b> |               |               |                   |    |      |
| <b>Residual</b>                                                                           | <b>0.043</b>  | <b>0.208</b> |               |               |                   |    |      |
| <b>Female plasma androgen levels in the GnRH challenge:</b>                               |               |              |               |               |                   |    |      |
| <b>Fixed effects</b>                                                                      |               |              |               |               |                   |    |      |
|                                                                                           | Estimate      | SE           | $\chi^2$      | df            | p                 |    |      |
| <b>(Intercept)</b>                                                                        | <b>0.751</b>  | <b>0.076</b> |               |               |                   |    |      |
| Maternal social environment * own social environment * sample <sup>a</sup>                | 0.136         | 0.159        | 0.72          | 1             | 0.40              |    |      |
| Maternal social environment * sample <sup>a</sup>                                         | -0.032        | 0.069        | 0.22          | 1             | 0.64              |    |      |
| Maternal social environment * own social environment <sup>a</sup>                         | 0.161         | 0.194        | 0.55          | 1             | 0.46              |    |      |
| Own social environment * sample <sup>a</sup>                                              | -0.079        | 0.080        | 0.96          | 1             | 0.33              |    |      |
| <b>Maternal social environment</b>                                                        | <b>0.020</b>  | <b>0.104</b> | <b>0.04</b>   | <b>1</b>      | <b>0.85</b>       |    |      |
| <b>Own social environment</b>                                                             | <b>0.044</b>  | <b>0.100</b> | <b>0.17</b>   | <b>1</b>      | <b>0.68</b>       |    |      |
| <b>Sample</b>                                                                             | <b>0.223</b>  | <b>0.035</b> | <b>26.43</b>  | <b>1</b>      | <b>&lt; 0.001</b> |    |      |
| <b>Random effects</b>                                                                     |               |              |               |               |                   |    |      |
|                                                                                           | Variance      | Std.Dev.     |               |               |                   |    |      |
| <b>Maternal ID : F1 ID<sup>b</sup></b>                                                    | <b>0.045</b>  | <b>0.213</b> |               |               |                   |    |      |
| <b>Maternal ID</b>                                                                        | <b>0.018</b>  | <b>0.135</b> |               |               |                   |    |      |
| <b>Residual</b>                                                                           | <b>0.020</b>  | <b>0.143</b> |               |               |                   |    |      |
| <b>Including female mass as a covariate:</b>                                              |               |              |               |               |                   |    |      |
| <b>Fixed effects</b>                                                                      |               |              |               |               |                   |    |      |
|                                                                                           | Estimate      | SE           | df            | t             | $\chi^2$          | df | p    |
| <b>(Intercept)</b>                                                                        | <b>-0.744</b> | <b>0.559</b> | <b>41.512</b> | <b>-1.331</b> |                   |    |      |
| Maternal social environment * own social environment * sample * F1 body mass <sup>a</sup> | -0.002        | 0.007        | 33.208        | -0.271        | 0.07              | 1  | 0.79 |
| Maternal social environment * own social environment * F1                                 | -0.007        | 0.010        | 33.460        | -0.743        | 0.54              | 1  | 0.46 |

| body mass <sup>a</sup>                                                     |                              |                             |               |               |                |          |              |
|----------------------------------------------------------------------------|------------------------------|-----------------------------|---------------|---------------|----------------|----------|--------------|
| Maternal social environment * sample * F1 body mass <sup>a</sup>           | -0.003                       | 0.003                       | 33.205        | -0.869        | 0.75           | 1        | 0.39         |
| Maternal social environment * own social environment * sample <sup>a</sup> | 0.087                        | 0.145                       | 33.714        | 0.602         | 0.36           | 1        | 0.55         |
| Own social environment * sample * F1 body mass <sup>a</sup>                | 0.002                        | 0.003                       | 33.206        | 0.692         | 0.48           | 1        | 0.49         |
| Own social environment * sample <sup>a</sup>                               | -0.012                       | 0.076                       | 33.677        | -0.152        | 0.02           | 1        | 0.88         |
| Maternal social environment * F1 body mass <sup>a</sup>                    | -0.002                       | 0.005                       | 33.058        | -0.497        | 0.20           | 1        | 0.66         |
| Maternal social environment * own social environment <sup>a</sup>          | 0.074                        | 0.120                       | 34.477        | 0.370         | 0.14           | 1        | 0.71         |
| Maternal social environment * sample <sup>a</sup>                          | -0.038                       | 0.062                       | 33.429        | -0.612        | 0.37           | 1        | 0.54         |
| Own social environment * F1 body mass <sup>a</sup>                         | -0.007                       | 0.005                       | 33.987        | -1.491        | 2.15           | 1        | 0.14         |
| <b>Sample * F1 body mass</b>                                               | <b>-0.005</b>                | <b>0.002</b>                | <b>33.230</b> | <b>-2.964</b> | <b>7.80</b>    | <b>1</b> | <b>0.005</b> |
| <b>Maternal social environment</b>                                         | <b>0.030</b>                 | <b>0.089</b>                | <b>34.150</b> | <b>0.332</b>  | <b>0.11</b>    | <b>1</b> | <b>0.74</b>  |
| <b>Own social environment</b>                                              | <b>-0.046</b>                | <b>0.106</b>                | <b>34.463</b> | <b>-0.492</b> | <b>0.17</b>    | <b>1</b> | <b>0.68</b>  |
| <b>F1 body mass</b>                                                        | <b>0.007</b>                 | <b>0.003</b>                | <b>41.387</b> | <b>2.685</b>  |                |          | <b>0.006</b> |
| <b>Sample</b>                                                              | <b>1.273</b>                 | <b>0.356</b>                | <b>33.220</b> | <b>3.579</b>  |                |          | <b>0.001</b> |
| Random effects                                                             |                              |                             |               |               |                |          |              |
|                                                                            | Variance                     | Std.Dev.                    |               |               |                |          |              |
| <b>Maternal ID : F1 ID<sup>b</sup></b>                                     | <b>0.058</b>                 | <b>0.241</b>                |               |               |                |          |              |
| <b>Maternal ID</b>                                                         | <b>1.17*10<sup>-15</sup></b> | <b>3.42*10<sup>-8</sup></b> |               |               |                |          |              |
| <b>Residual</b>                                                            | <b>0.016</b>                 | <b>0.127</b>                |               |               |                |          |              |
| Post-hoc tests; split by sample:                                           |                              |                             |               |               |                |          |              |
| Baseline                                                                   |                              |                             |               |               |                |          |              |
| Fixed effects                                                              |                              |                             |               |               |                |          |              |
|                                                                            | Estimate                     | SE                          | df            | t             | χ <sup>2</sup> | df       | p            |
| <b>(Intercept)</b>                                                         | <b>-0.560</b>                | <b>0.621</b>                | <b>33.440</b> | <b>-0.901</b> |                |          |              |
| <b>Maternal social environment</b>                                         | <b>0.037</b>                 | <b>0.113</b>                | <b>17.108</b> | <b>0.326</b>  | <b>0.10</b>    | <b>1</b> | <b>0.75</b>  |
| <b>Own social environment</b>                                              | <b>-0.005</b>                | <b>0.122</b>                | <b>29.814</b> | <b>-0.045</b> | <b>0.002</b>   | <b>1</b> | <b>0.97</b>  |
| <b>F1 body mass</b>                                                        | <b>0.006</b>                 | <b>0.003</b>                | <b>33.770</b> | <b>2.104</b>  | <b>3.30</b>    | <b>1</b> | <b>0.07</b>  |
| Random effects                                                             |                              |                             |               |               |                |          |              |
|                                                                            | Variance                     | Std.Dev.                    |               |               |                |          |              |
| <b>Maternal ID</b>                                                         | <b>0.015</b>                 | <b>0.123</b>                |               |               |                |          |              |
| <b>Residual</b>                                                            | <b>0.078</b>                 | <b>0.280</b>                |               |               |                |          |              |
| Post challenge                                                             |                              |                             |               |               |                |          |              |
| Fixed effects                                                              |                              |                             |               |               |                |          |              |
|                                                                            | Estimate                     | SE                          | df            | t             | χ <sup>2</sup> | df       | p            |
| <b>(Intercept)</b>                                                         | <b>0.531</b>                 | <b>0.488</b>                | <b>33.000</b> | <b>1.089</b>  |                |          |              |
| <b>Maternal social environment</b>                                         | <b>0.011</b>                 | <b>0.083</b>                | <b>33.000</b> | <b>0.134</b>  | <b>0.02</b>    | <b>1</b> | <b>0.89</b>  |
| <b>Own social environment</b>                                              | <b>-0.051</b>                | <b>0.101</b>                | <b>33.000</b> | <b>-0.504</b> | <b>0.25</b>    | <b>1</b> | <b>0.62</b>  |
| <b>F1 body mass</b>                                                        | <b>0.002</b>                 | <b>0.002</b>                | <b>33.000</b> | <b>0.950</b>  | <b>0.89</b>    | <b>1</b> | <b>0.35</b>  |
| Random effects                                                             |                              |                             |               |               |                |          |              |
|                                                                            | Variance                     | Std.Dev.                    |               |               |                |          |              |

|                    |                          |                          |
|--------------------|--------------------------|--------------------------|
| <b>Maternal ID</b> | <b>0.000<sup>c</sup></b> | <b>0.000<sup>c</sup></b> |
| <b>Residual</b>    | <b>0.065</b>             | <b>0.237</b>             |

Estimates for plasma corticosterone levels are given on the log10 scale, estimates for plasma androgen levels are given on the original scale. Maternal and F1 pair-housing is coded as 0, group-housing is coded as 1. The baseline sample (before restraint or the GnRH injection) is coded as 1, the post-restraint/challenge sample is coded as 2. Factors included in the final models are presented in bold.

<sup>a</sup> estimates and statistics are from the last model that still included the factor/interaction.

<sup>b</sup> F1 ID nested within maternal ID.

<sup>c</sup> variance parameters estimated as zero in the model.

**Table S5. Generalized linear mixed model of effects of the maternal and F1 own social environment on egg laying rates, fertilization success, hatching success of fertilized eggs and overall hatching rates (the proportion of all eggs collected for the F2 generation that hatched, i.e. including non-fertilized eggs).**

| <b>Effects on egg laying rates:</b>                               |                          |                          |             |          |             |
|-------------------------------------------------------------------|--------------------------|--------------------------|-------------|----------|-------------|
| <b>Fixed effects:</b>                                             |                          |                          |             |          |             |
|                                                                   | Estimate                 | SE                       | $\chi^2$    | df       | p           |
| <b>(Intercept)</b>                                                | <b>1.241</b>             | <b>0.244</b>             |             |          |             |
| Maternal social environment * own social environment <sup>a</sup> | -0.071                   | 0.626                    | 0.01        | 1        | 0.92        |
| <b>Maternal social environment</b>                                | <b>0.309</b>             | <b>0.327</b>             | <b>0.89</b> | <b>1</b> | <b>0.34</b> |
| <b>Own social environment</b>                                     | <b>-0.105</b>            | <b>0.327</b>             | <b>0.10</b> | <b>1</b> | <b>0.75</b> |
| <b>Random effects:</b>                                            |                          |                          |             |          |             |
|                                                                   | Variance                 | Std.Dev.                 |             |          |             |
| <b>Maternal ID : F1 ID<sup>b</sup></b>                            | <b>0.008</b>             | <b>0.090</b>             |             |          |             |
| <b>Maternal ID</b>                                                | <b>0.111</b>             | <b>0.334</b>             |             |          |             |
| <b>Effects on fertilization success:</b>                          |                          |                          |             |          |             |
| <b>Fixed effects:</b>                                             |                          |                          |             |          |             |
|                                                                   | Estimate                 | SE                       | $\chi^2$    | df       | p           |
| <b>(Intercept)</b>                                                | <b>1.318</b>             | <b>0.313</b>             |             |          |             |
| Maternal social environment * own social environment <sup>a</sup> | 0.721                    | 0.814                    | 0.77        | 1        | 0.38        |
| <b>Maternal social environment</b>                                | <b>-0.673</b>            | <b>0.389</b>             | <b>2.89</b> | <b>1</b> | <b>0.09</b> |
| <b>Own social environment</b>                                     | <b>-0.432</b>            | <b>0.416</b>             | <b>1.08</b> | <b>1</b> | <b>0.30</b> |
| <b>Random effects:</b>                                            |                          |                          |             |          |             |
|                                                                   | Variance                 | Std.Dev.                 |             |          |             |
| <b>Maternal ID : F1 ID<sup>b</sup></b>                            | <b>0.597</b>             | <b>0.773</b>             |             |          |             |
| <b>Maternal ID</b>                                                | <b>0.000<sup>c</sup></b> | <b>0.000<sup>c</sup></b> |             |          |             |
| <b>Effects on the hatching success of fertilized eggs:</b>        |                          |                          |             |          |             |
| <b>Fixed effects:</b>                                             |                          |                          |             |          |             |
|                                                                   | Estimate                 | SE                       | $\chi^2$    | df       | p           |
| <b>(Intercept)</b>                                                | <b>-0.745</b>            | <b>0.236</b>             |             |          |             |
| Maternal social environment * own social environment <sup>a</sup> | 0.253                    | 0.716                    | 0.13        | 1        | 0.72        |
| <b>Maternal social environment</b>                                | <b>0.536</b>             | <b>0.324</b>             | <b>2.63</b> | <b>1</b> | <b>0.11</b> |
| <b>Own social environment</b>                                     | <b>0.744</b>             | <b>0.356</b>             | <b>4.07</b> | <b>1</b> | <b>0.04</b> |
| <b>Random effects:</b>                                            |                          |                          |             |          |             |
|                                                                   | Variance                 | Std.Dev.                 |             |          |             |
| <b>Maternal ID : F1 ID<sup>b</sup></b>                            | <b>0.001</b>             | <b>0.038</b>             |             |          |             |
| <b>Maternal ID</b>                                                | <b>0.000<sup>c</sup></b> | <b>0.000<sup>c</sup></b> |             |          |             |
| <b>Effects on overall hatching rates:</b>                         |                          |                          |             |          |             |
| <b>Fixed effects:</b>                                             |                          |                          |             |          |             |
|                                                                   | Estimate                 | SE                       | $\chi^2$    | df       | p           |
| <b>(Intercept)</b>                                                | <b>-1.193</b>            | <b>0.275</b>             |             |          |             |
| Maternal social environment * own social environment <sup>a</sup> | 0.308                    | 0.633                    | 0.24        | 1        | 0.63        |
| <b>Maternal social environment</b>                                | <b>0.188</b>             | <b>0.334</b>             | <b>0.32</b> | <b>1</b> | <b>0.57</b> |
| <b>Own social environment</b>                                     | <b>0.446</b>             | <b>0.318</b>             | <b>1.88</b> | <b>1</b> | <b>0.17</b> |

| <b>Random effects:</b>                 |                          |                          |
|----------------------------------------|--------------------------|--------------------------|
|                                        | Variance                 | Std.Dev.                 |
| <b>Maternal ID : F1 ID<sup>b</sup></b> | <b>0.000<sup>c</sup></b> | <b>0.000<sup>c</sup></b> |
| <b>Maternal ID</b>                     | <b>0.122</b>             | <b>0.350</b>             |

Estimates are given on the logit scale. Maternal and F1 pair-housing is coded as 0, group-housing is coded as 1. Factors included in the final model are presented in bold.

<sup>a</sup> estimates and statistics are from the last model that still included the interaction.

<sup>b</sup> F1 ID nested within maternal ID.

<sup>c</sup> variance parameters estimated as zero in the model.
